# Supplementary material for: Molecular dynamics simulations of wild type and mutants of botulinum neurotoxin A complexed with synaptic vesicle protein 2C
Source: Royal Society of Chemistry journal article supplement (doi:10.1039/c4mb00383g), 2014-10-21
Supplement: c4mb00383g2.pdf [file c4mb00383g2.pdf]

Table S1 Hydrogen bonds between BoNT/A-RBD and SV2C-LD in four mutate systems

| R1294A     |          |           | R1156E     |          |           |
|------------|----------|-----------|------------|----------|-----------|
| BONT/A-RBD | SV2C-LD  | Occupancy | BONT/A-RBD | SV2C-LD  | Occupancy |
| M1144-N    | C560-O   | 93.4%     | M1144-N    | C560-O   | 91.4%     |
| S1142-O    | F562-N   | 91.7%     | M1144-O    | C560-N   | 89.4%     |
| S1142-N    | F562-O   | 74.9%     | T1146-N    | F557-O   | 84.4%     |
| M1144-O    | C560-N   | 72.0%     | T1146-OG1  | F557-N   | 62.5%     |
| T1146-OG1  | F557-N   | 43.3%     | T1145-OG1  | N559-N   | 59.6%     |
| A1294-N    | S561-OG  | 33.9%     | E1156-OE2  | H564-NE2 | 42.1%     |
| T1145-OG1  | N559-N   | 23.3%     | S1142-O    | F562-N   | 36.9%     |
| T1146-OG1  | E556-OE1 | 19.1%     | T1146-OG1  | E556-OE1 | 28.3%     |
| T1145-OG1  | N559-OD1 | 15.5%     | T1146-OG1  | E556-OE2 | 24.3%     |
| T1146-N    | F557-O   | 15.0%     | E1156-OE1  | H564-NE2 | 24.2%     |
| T1146-OG1  | E556-OE2 | 13.2%     | K1137-NZ   | N565-OT2 | 21.2%     |
| N954-ND2   | F557-O   | 13.1%     | K1137-NZ   | N565-OT1 | 18.2%     |
| G1292-O    | N559-ND2 | 11.7%     | R1294-NH2  | T521-OG1 | 15.4%     |
| F563A      |          |           | Y952-O     | K558-NZ  | 13.2%     |
| BONT/A-RBD | SV2C-LD  | Occupancy | F953-O     | K558-NZ  | 12.9%     |
| M1144-N    | C560-O   | 94.4%     | N1147-ND2  | E556-OE2 | 12.7%     |
| S1142-O    | F562-N   | 92.1%     | R1294-NH1  | D539-OD2 | 12.0%     |
| T1146-N    | F557-O   | 85.3%     | R1294-NH2  | D539-OD2 | 11.7%     |
| M1144-O    | C560-N   | 78.2%     | TT1145/6AA |          |           |
| BONT/A-RBD | SV2C-LD  | Occupancy | BONT/A-RBD | SV2C-LD  | Occupancy |
| Y1149-OH   | N559-OD1 | 70.5%     | S1142-O    | F562-N   | 91.9%     |
| T1146-OG1  | F557-N   | 68.6%     | Y1122-OH   | N565-OT1 | 88.9%     |
| T1145-OG1  | N559-N   | 66.2%     | R1156-NH2  | N565-OT2 | 87.0%     |
| S1142-N    | F562-O   | 48.2%     | R1156-NE   | N565-OT1 | 86.6%     |
| R1294-NH1  | D539-OD1 | 46.4%     | M1144-N    | C560-O   | 81.0%     |
| R1294-NE   | D539-OD1 | 36.4%     | S1142-N    | F562-O   | 79.1%     |
| R1294-NE   | D539-OD2 | 35.8%     | R1294-NH1  | D539-OD1 | 54.8%     |
| E1293-OE2  | S561-OG  | 28.7%     | R1294-NH2  | D539-OD2 | 54.1%     |
| K1187-NZ   | E523-OE1 | 28.3%     | R1156-NH2  | D543-OD1 | 50.9%     |
| R1294-NH1  | D539-OD2 | 28.0%     | R1156-NH1  | D543-OD2 | 48.8%     |
| K1187-NZ   | D543-OD1 | 22.9%     | R1156-NH2  | D543-OD2 | 45.8%     |
| R1156-NH1  | S561-OG  | 22.7%     | R1156-NH1  | D543-OD1 | 44.7%     |
| R1156-NH2  | F542-O   | 19.1%     | R1294-NH2  | D539-OD1 | 41.4%     |
| T1146-OG1  | E556-OE1 | 17.1%     | R1294-NH1  | D539-OD2 | 40.5%     |
| T1146-OG1  | E556-OE2 | 17.1%     | R1156-NH2  | N565-OT1 | 14.2%     |
| K1187-NZ   | D543-OD2 | 16.7%     |            |          |           |
| G1292-O    | N559-ND2 | 14.8%     |            |          |           |
| K1137-NZ   | N565-OT1 | 14.0%     |            |          |           |
| K1137-NZ   | N565-OT2 | 13.7%     |            |          |           |
| K1187-NZ   | E523-OE2 | 13.6%     |            |          |           |
