# Supplementary figures and images for: Molecular dynamics simulations of wild type and mutants of botulinum neurotoxin A complexed with synaptic vesicle protein 2C
Source: Royal Society of Chemistry journal article supplement (doi:10.1039/c4mb00383g), 2014-10-21

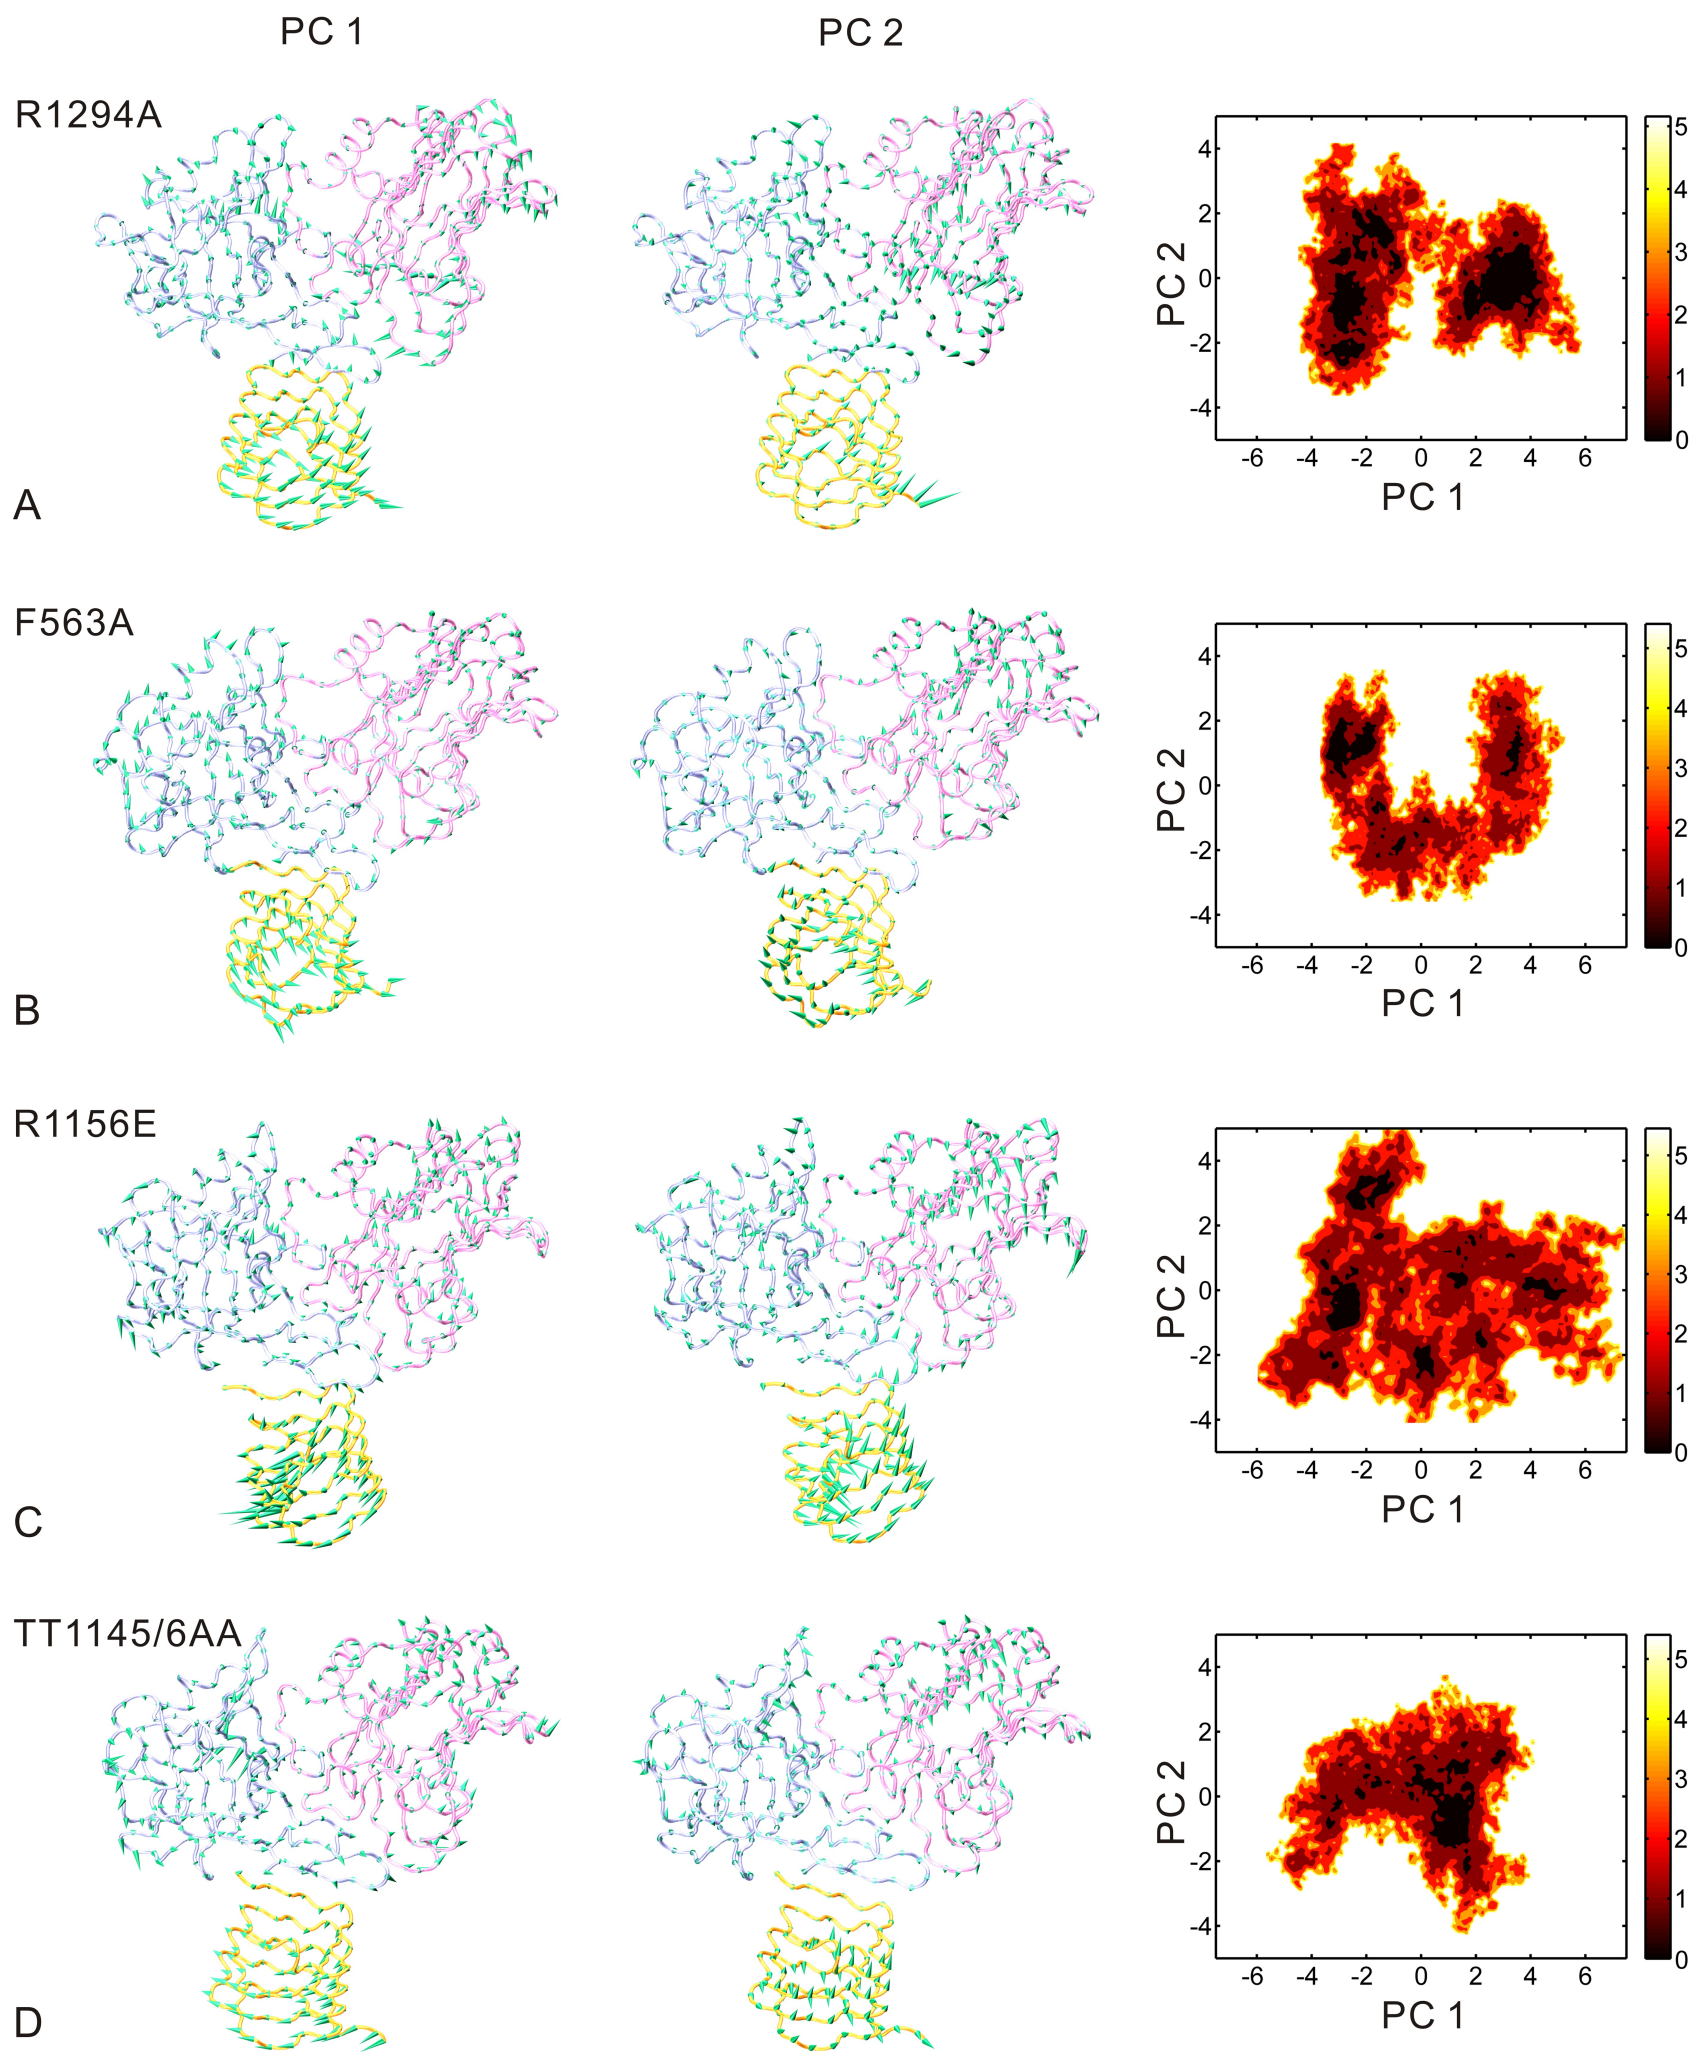

Supplement: c4mb00383g3.pdf [file c4mb00383g3.pdf]

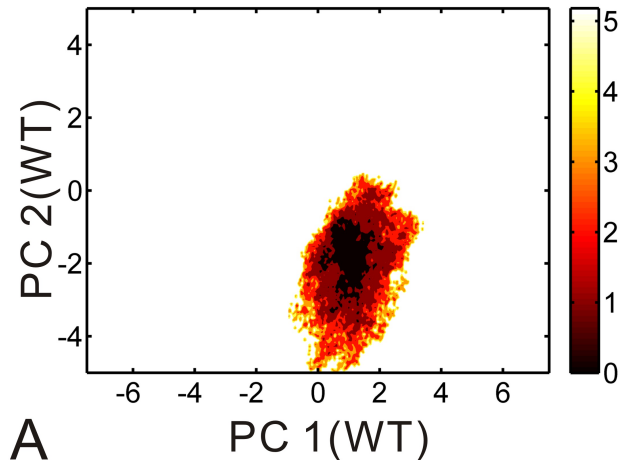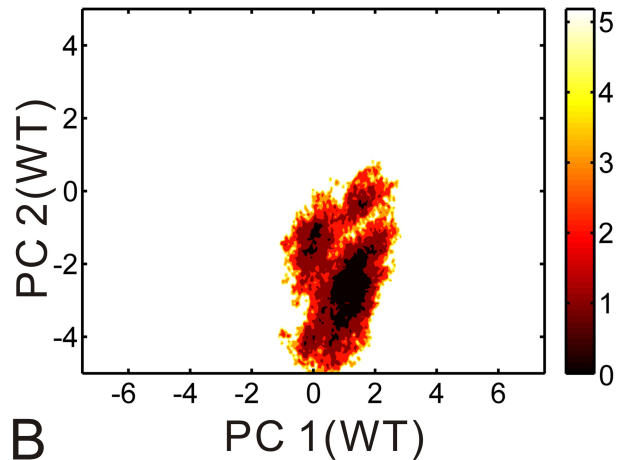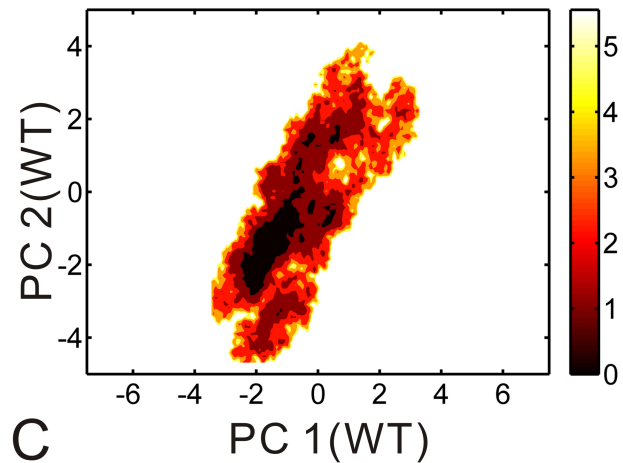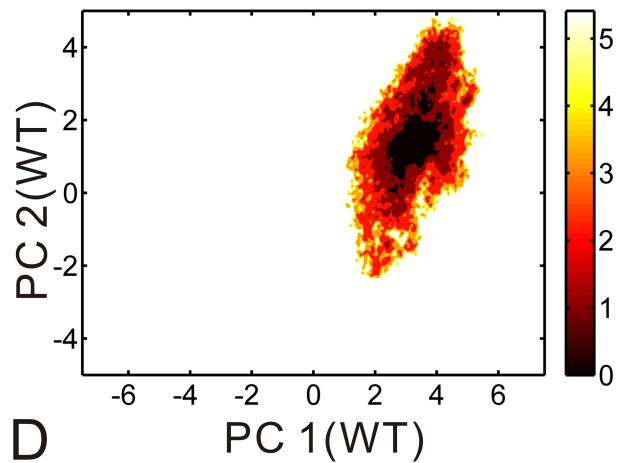

Supplement: c4mb00383g4.pdf [file c4mb00383g4.pdf]
